# Supplementary material
Source: PubMed Central journal article supplement (PMC5787030)

**Supplemental Figure S1** Expression of LPA receptors (LPAR) in primary human hepatic stellate cells from 3 different donors. Data represent relative mRNA levels normalised versus levels of RNA-polymerase II (RNAPol2). Dots represent three individual donors.

**Supplemental Figure S2** IC<sub>50</sub> curves of Ex<sub>31</sub> from the (A) biochemical and (B) rat whole blood assay. The potency of Ex<sub>31</sub> was determined as described recently (Bretschneider *et al.*, 2017). Briefly, the reaction buffer consisted of 50 mM Tris (pH 8.0), 3 mM KCl, 1 mM CaCl<sub>2</sub>, 1 mM Mg Cl<sub>2</sub>, 0.14 mM NaCl and 0.1% bovine serum albumin, which was supplemented with 5 nM recombinant rat ATX. Ex<sub>31</sub> was added to the assay solution in a concentration range from 0.1 nM to 10  $\mu$ M. To 2.5  $\mu$ L of this solution, 2.5  $\mu$ L of a 10  $\mu$ M 18:1 LPC substrate solution was added to initiate the biochemical reaction. After 2 h incubation at room temperature the samples were analysed by LC-MS. The whole blood potency was determined by incubation of 45  $\mu$ L heparinized rat whole blood with a serial dilution of Ex<sub>31</sub> (0.12 to 100  $\mu$ M). After 1 h at 37 °C the reaction was stopped by addition of 100  $\mu$ L 40 mM disodium hydrogen phosphate buffer containing 30 mM citric acid (pH 4) and 1  $\mu$ M 17:0 LPA (internal standard). Subsequently, LPA was extracted by liquid-liquid extraction using 500  $\mu$ L butanol. The samples were analysed by LC-MS. IC<sub>50</sub> values were calculated by applying a sigmoidal Hill equation.

**Supplemental Table S3** Eurofin Cerep profile of Ex<sub>31</sub>. Values represent relative activities in Ex<sub>31</sub> treated samples (10  $\mu$ M) compared to untreated controls.

**Supplemental Table S4** In the CCl<sub>4</sub> study, male Sprague Dawley rats were administered CCl<sub>4</sub> (0.25 mL kg<sup>-1</sup> in olive oil, twice weekly) for a total duration of 10 weeks. After 6 weeks, animals were stratified based on plasma collagen IV (Col. IV) and 18:1 LPA levels. Each row represents one individual animal, which was assigned to the Vehicle (columns 1 and 2) or Ex<sub>31</sub> (columns 3 and 4) group.

**Supplemental Table S5** Male Wistar rats were fed a CDAA diet for a total duration of 14 weeks. After 9 weeks, animals were stratified based on histology assessment of liver biopsies. Values represent quantification of fibrotic area based on collagen I-stained liver sections. Each row represents one individual animal, which was assigned to the Vehicle (column 1) or Ex<sub>31</sub> (column 2) group.

**Supplemental Figure S6** Normalised plasma lysophosphatidylcholine (LPC) levels and lysophosphatidic acid to LPC ratios in choline-deficient amino acid-defined diet-induced liver injury model. Data represent mean  $\pm$  SEM, n=12, \*\*p<0.01.

**Supplemental Table S7** Permeability of LPA species in  $\text{cm} \cdot \text{sec}^{-1}$ .

**Supplemental Table S8** List of TaqMan assays and primers/probes for RT-PCR.

**Supplemental Figure S9** Synthesis scheme for ATX inhibitor Ex\_31 (Example 31(24)).

**Supplemental Figure S10** Analytical Data for Ex\_31:  $R_f$  = 0.4 (10% MeOH:Dichloromethane); m.p.: 176-180 °C;  $^1\text{H-NMR}$  (400 MHz, DMSO- $d_6$ )  $\delta$  ppm 12.01 (s, 1 H), 8.20 (dd,  $J$  = 4.7, 1.3 Hz, 1 H), 7.93-7.90 (m, 1 H), 7.50-7.46 (m, 1 H), 7.20-7.17 (m, 1 H), 7.11 (dd,  $J$  = 7.8, 4.8 Hz, 1 H), 6.90-6.83 (m, 1 H), 5.53-5.48 (m, 2 H), 4.66 (s, 2 H), 3.82-3.75 (m, 2 H), 2.79-2.66 (m, 2 H), 2.34-2.06 (m, 3 H), 1.90-1.65 (m, 5 H), 1.34-1.22 (m, 2 H), 1.05-0.86 (m, 2 H);  $m/z$  = 484.2  $[\text{M}+\text{H}]^+$ .

**Supplemental Figure S11** *Ex-vivo* measurement of ATX activity in plasma and homogenates from un-perfused and perfused livers. Heparin plasma and un-perfused and perfused livers rat livers were collected and immediately frozen at -20 °C until analysis. 100 mg liver were homogenised in 500  $\mu\text{L}$  PBS buffer using a dry iced cooled Precyllis Evolution (Bertin Technologies). The cell debris were pelleted by centrifugation at 10,000 rpm, 10 min and 4 °C. 400  $\mu\text{L}$  of the supernatants or 35  $\mu\text{L}$  plasma were supplemented with 10  $\mu\text{M}$  18:2 LPC and samples were incubated at 37 °C. After 1 h the reaction was stopped by the addition of 40 mM disodiumhydrogenphosphate buffer containing 30 mM citric acid (pH 4) and 1  $\mu\text{M}$  17:0 LPA (internal standard). Subsequently, LPA was extracted by liquid-liquid extraction using 500  $\mu\text{L}$  butanol as described above. Data represent individual values and mean  $\pm$  SD, n=3.

**Supplemental Figure S12A** Individual relative plasma LPA species in  $\text{CCl}_4$  model. LPA levels were determined as described in the materials and methods section. Data represent mean  $\pm$  SEM, n=10 (control) and n=13 ( $\text{CCl}_4$ -treated), \*p<0.05, n.s. = not significant. Levels were below detection limit in several samples of the vehicle and  $\text{CCl}_4/\text{Ex}_31$  groups for 16:0 LPA and in the  $\text{CCl}_4/\text{Ex}_31$  group for 18:0 LPA and 18:1 LPA. Thus statistical power calculations are not applicable for these groups (NA).

**Supplemental Figure S12B** Individual relative liver LPA species in  $\text{CCl}_4$  model. LPA levels were determined as described in the materials and methods section. Data represent mean  $\pm$  SEM, n=10 (control) and n=13 ( $\text{CCl}_4$ -treated), \*p<0.05, n.s. = not significant.

**Supplemental Figure S12C** Individual relative plasma LPA species in CDAA model. LPA levels were determined as described in the materials and methods section. Data represent mean  $\pm$  SEM, n=12, \*p<0.05, n.s. = not significant. Levels were below detection limit in several

samples of the CDAA/Ex\_31 groups for 16:0 LPA, 18:0 LPA and 18:1 LPA. Thus statistical power calculations are not applicable for these groups (NA).

**Supplemental Figure S12D** Individual relative liver LPA species in CDAA model. LPA levels were determined as described in the materials and methods section. Data represent mean  $\pm$  SEM, n=12, \*p<0.05, n.s. = not significant.

Supplemental Figure S1

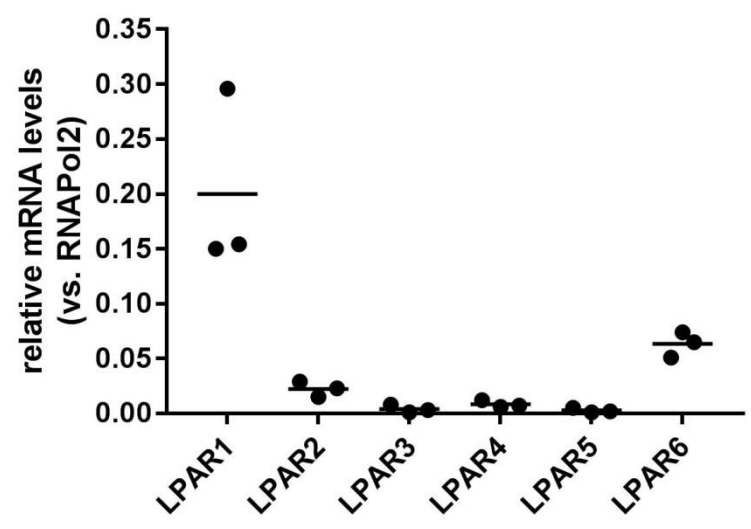

Supplemental Figure S2

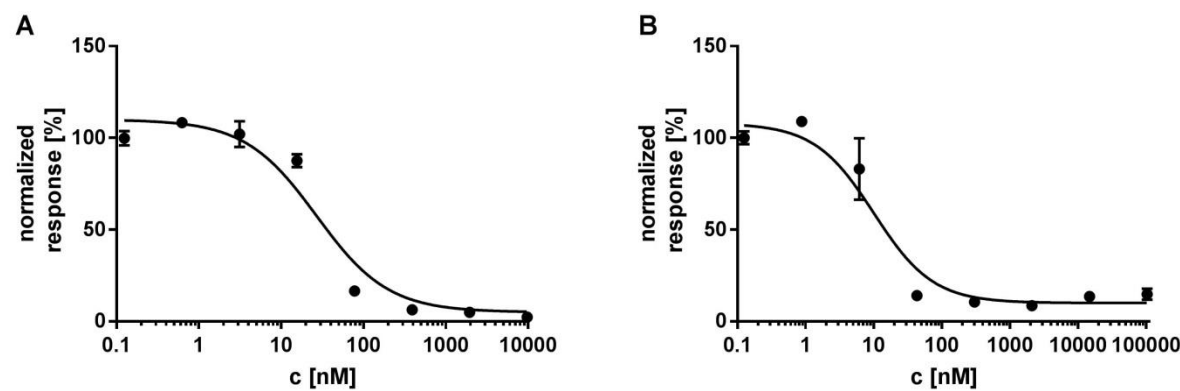

### Supplemental Table S3

| Method                                                                            | Activity (%) |
|-----------------------------------------------------------------------------------|--------------|
| 5-HT transporter (antagonist radioligand)                                         | -6           |
| 5-HT2A (h) (agonist radioligand)                                                  | 3            |
| 5-HT2B (agonist site) / [125I](±)DOI / human                                      | 3            |
| Acetylcholinesterase ACE (human, AMTCh 400 uM)                                    | -12          |
| Adrenergic alpha2A / [3H]RX 821002 / human                                        | -3           |
| Adrenergic beta1 / [3H](-)CGP 12177 / Human recombinant                           | 9            |
| Adrenergic beta2 / [3H](-)CGP 12177 / Human recombinant                           | -2           |
| alpha 1A (h) (antagonist radioligand)                                             | 18           |
| Benzodiazepine BZD central / [3H]flunitrazepam / Rat brain                        | -7           |
| Ca <sup>2+</sup> channel L(dihydropyridine site) / [3H](+)PN200-110 / Rat brain   | 7            |
| COX-1 / arachidonic acid / human                                                  | 6            |
| COX-2 / arachidonic acid / human                                                  | 5            |
| D2S (h) (agonist radioligand)                                                     | 16           |
| Dopamine D1 / [3H]SCH 23390 / Human recombinant                                   | -22          |
| Dopamine transporter / [3H]GBR12935 / Human recombinant                           | -9           |
| Endothelin ETA / [125I]endothelin-1 / Human recombinant                           | 5            |
| Glutamate NMDA / [3H]CGP 39653 / Rat brain                                        | 5            |
| Histamine H1 / [3H]pyrilamine / Human recombinant                                 | 5            |
| K <sup>+</sup> channel volt-dependent / [125I]a-dendrotoxin / Rat brain           | -1           |
| kappa (KPO) / [3H]U 69593 / Rat                                                   | -3           |
| Lck kinase (h)                                                                    | -4           |
| MAO-A (antagonist radioligand)                                                    | 11           |
| MCH1 (h) (agonist radioligand)                                                    | -4           |
| Muscarinic M2 / [3H]AF-DX 384 / Human recombinant                                 | -8           |
| Muscarinic M3 / [3H]4-DAMP / Human recombinant                                    | 15           |
| N neuronal alpha4beta2 (agonist radioligand)                                      | 0            |
| Na <sup>+</sup> channel site 2 / [3H]batrachotoxin / Rat brain                    | 10           |
| Norepinephrine transporter / [3H]nisoxetine / Human recombinant                   | -1           |
| Opiate delta2 (DOP) / [3H]DADLE / Human recombinant                               | 19           |
| Phosphodiesterase PDE3A (human)                                                   | 6            |
| Phosphodiesterase PDE4D2 (human)                                                  | 75           |
| Potassium Channel hERG (human), [3H] Dofetilide                                   | 1            |
| RB. Cannabinoid central CB1/[3H]WIN55212-2/Human recombinant                      | 27           |
| RB. Cannabinoid peripheral CB2/[3H]WIN55212-2/Human recombinant                   | 10           |
| RB. Cholecystokinin CCKA/[3H]devazepide/Human recombinant                         | 3            |
| RB.Adenosine A2a/ CGS 21680/ Human recombinant                                    | -11          |
| RB.Histamine H2/[125]APT/Human recombinant                                        | -8           |
| RB.Muscarinic M1/[3H]pirenzepine/Human recombinant (expressed in mammalian cells) | -14          |
| RB.Opiate mu/[3H]DAMGO/Human recombinant (expressed in mammalian cells)           | 10           |
| Serotonin 5-HT1A / [3H]8-OH-DPAT / Human recombinant                              | -1           |
| Serotonin 5-HT1B / [125I]CYP / Rat brain                                          | 4            |
| Serotonin 5-HT3/ [H3]BRL 43694 / human recombinant (HEK 293 cells)                | 1            |
| Steroid androgen (AR) / [3H]methyltrienolone / Human                              | -5           |
| Steroid glucocorticoid / [3H]triamcinolone acetonide / Human lymphoblastoid cells | 7            |
| Vasopressin V1a / [3H]AVP / Human recombinant                                     | 13           |

Supplemental Table S4

| CCl <sub>4</sub> / Vehicle |                       | CCl <sub>4</sub> / Ex_31 |                       |
|----------------------------|-----------------------|--------------------------|-----------------------|
| Col. IV<br>[μg/mL]         | LPA<br>(18:1)<br>[nM] | Col. IV<br>[μg/mL]       | LPA<br>(18:1)<br>[nM] |
| 4.1                        | 44.7                  | 3.4                      | 34.3                  |
| 5.7                        | 45.4                  | 3.9                      | 56.1                  |
| 2.6                        | 44.1                  | 4.6                      | 38.4                  |
| 12.3                       | 50.9                  | 6.2                      | 39.8                  |
| 5.1                        | 37.5                  | 7.2                      | 62.6                  |
| 6.0                        | 30.7                  | 7.0                      | 52.7                  |
| 3.9                        | 35.2                  | 5.4                      | 36.2                  |
| 7.2                        | 33.2                  | 5.7                      | 30.9                  |
| 5.7                        | 41.2                  | 10.8                     | 31.6                  |
| 3.4                        | 34.3                  | 6.8                      | 37.9                  |
| 6.2                        | 31.1                  | 2.6                      | 22.4                  |
| 3.3                        | 42.2                  | 3.1                      | 31.7                  |
| 4.6                        | 36.1                  | 6.2                      | 47.1                  |
| 7.1                        | 42.8                  | 4.0                      | 29.9                  |

Supplemental Table S5

| <b>CDA<br/>Vehicle</b>       | <b>CDA<br/>Ex_31</b>         |
|------------------------------|------------------------------|
| <b>fibrotic<br/>area [%]</b> | <b>fibrotic<br/>area [%]</b> |
| 0.75                         | 0.88                         |
| 4.00                         | 0.55                         |
| 0.32                         | 0.47                         |
| 1.05                         | 2.36                         |
| 1.95                         | 0.82                         |
| 2.61                         | 2.15                         |
| 0.65                         | 1.24                         |
| 1.46                         | 3.03                         |
| 2.54                         | 1.77                         |
| 0.99                         | 1.88                         |
| 1.59                         | 2.71                         |
| 2.11                         | 1.28                         |

Supplemental Figure S6

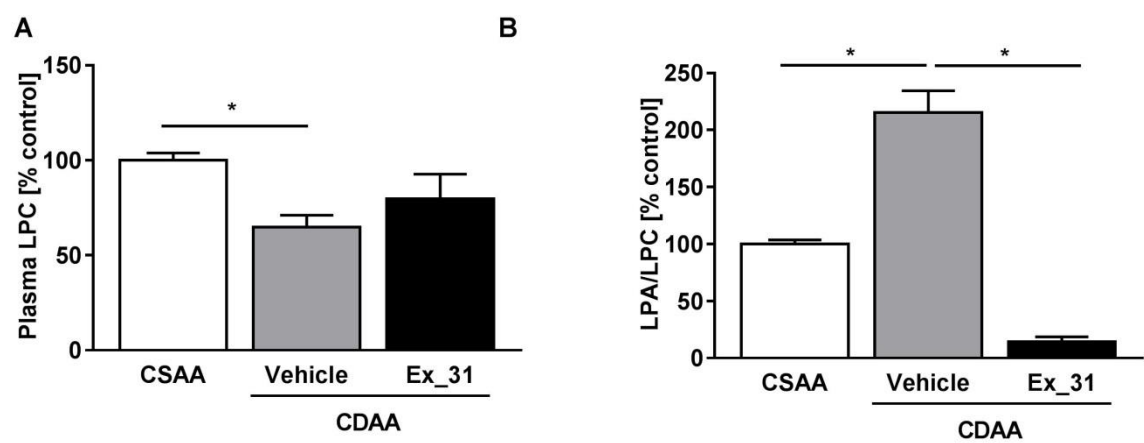

Supplemental Table S7

| <b>LPA species</b> | <b>pH 5</b>          | <b>pH 6.5</b>        | <b>pH 7.4</b>        |
|--------------------|----------------------|----------------------|----------------------|
| 16:0               | $2.6 \cdot 10^{-7}$  | $<7.2 \cdot 10^{-8}$ | $4.6 \cdot 10^{-7}$  |
| 18:1               | $<1.8 \cdot 10^{-7}$ | $<1.6 \cdot 10^{-7}$ | $<1.6 \cdot 10^{-7}$ |
| 18:2               | $4.1 \cdot 10^{-7}$  | $3.6 \cdot 10^{-7}$  | $2.9 \cdot 10^{-7}$  |
| 20:4               | $6.3 \cdot 10^{-7}$  | $4.1 \cdot 10^{-7}$  | $6.6 \cdot 10^{-7}$  |
| 18:0               | $<1.5 \cdot 10^{-7}$ | $<6.8 \cdot 10^{-8}$ | $<9.8 \cdot 10^{-8}$ |

Supplemental Table S8

| <b>Species</b> | <b>Gene</b>   | <b>Assay # (or sequence)</b>           |
|----------------|---------------|----------------------------------------|
| rat            | RNAPol2 fwd   | GCA GGC GAG AGC GTT GAG                |
| rat            | RNAPol2 rev   | CAT TGG TAT AAT CAA AAC GGA ACT TC     |
| rat            | RNAPol2 probe | CTG GCT ACA CTT AAG CCT TCT AAT AAA GC |
| rat            | Lpar1         | Rn00588435_m1                          |
| rat            | Itgam         | Rn00709342_m1                          |
| rat            | Emr1          | Rn01527631_m1                          |
| rat            | Tnfa          | Rn01525859_g1                          |
| rat            | Tgfb          | Rn00572010_m1                          |
| rat            | Ccl2          | Rn00580555_m1                          |
| rat            | Cxcl1         | Rn00578225_m1                          |
| human          | ACTA2         | Hs00426835_g1                          |
| human          | CTGF          | Hs01026927_g1                          |
| human          | CCL2          | Hs00234140_m1                          |
| human          | CXCL1         | Hs00236937_m1                          |
| human          | LPAR1         | Hs00173500_m1                          |
| human          | LPAR2         | Hs01109356_m1                          |
| human          | LPAR3         | Hs00173857_m1                          |
| human          | LPAR4         | Hs00271072_s1                          |
| human          | LPAR5         | Hs00252675_s1                          |
| human          | LPAR6         | Hs00271758_s1                          |
| human          | RNAPol 2      | Hs00172187_m1                          |

Supplemental Figure S9

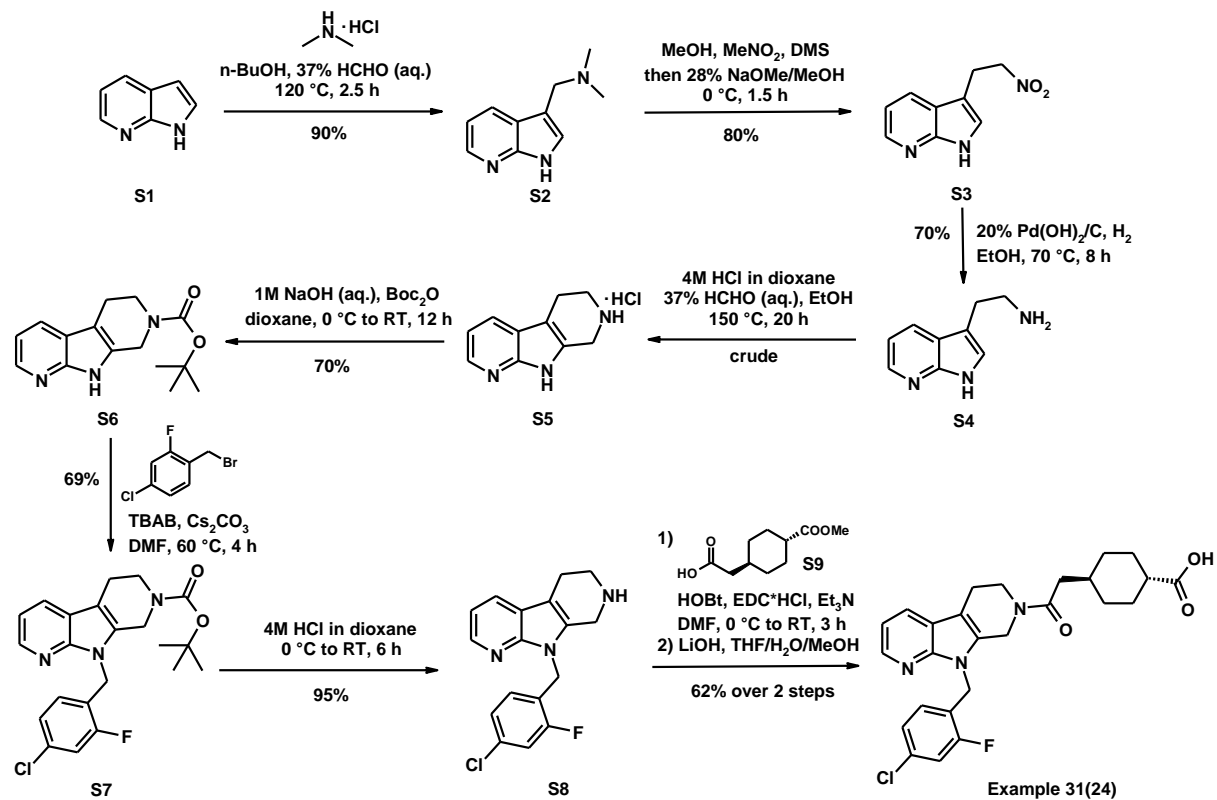

## Supplemental Figure S10

01.06.2017 17:58:18

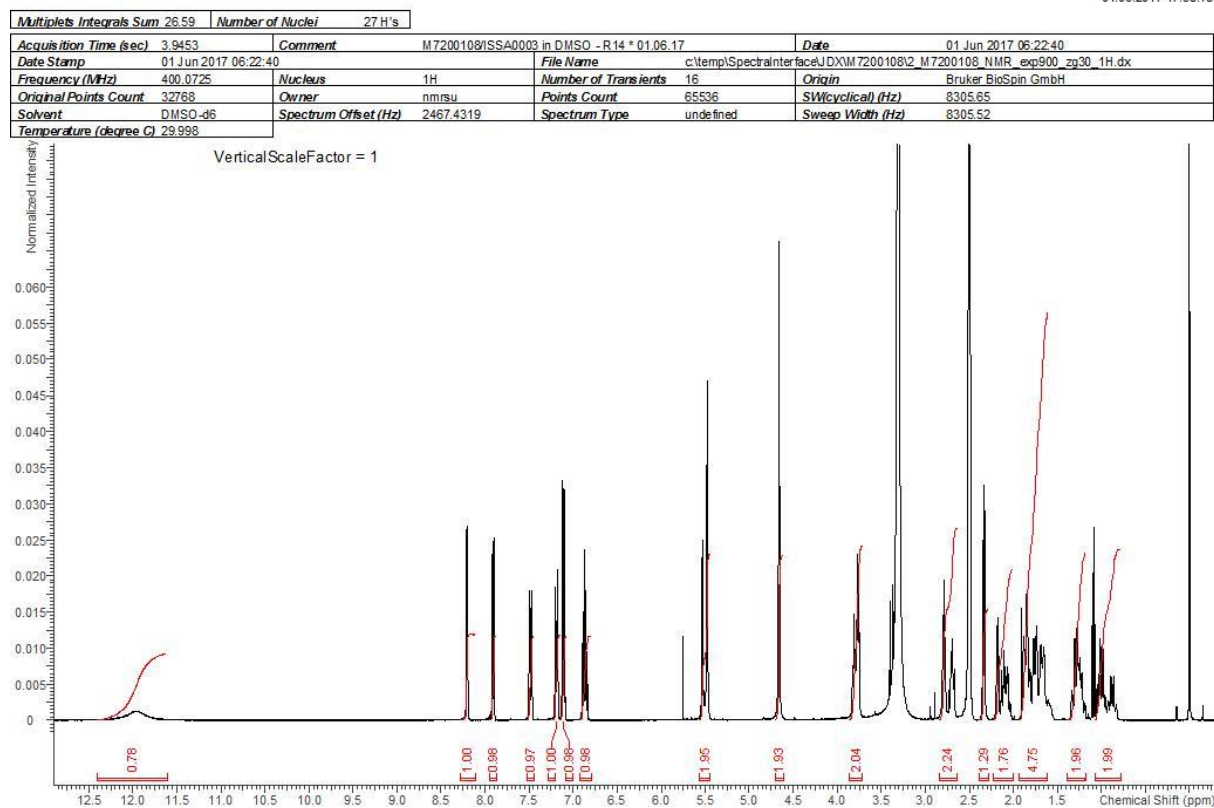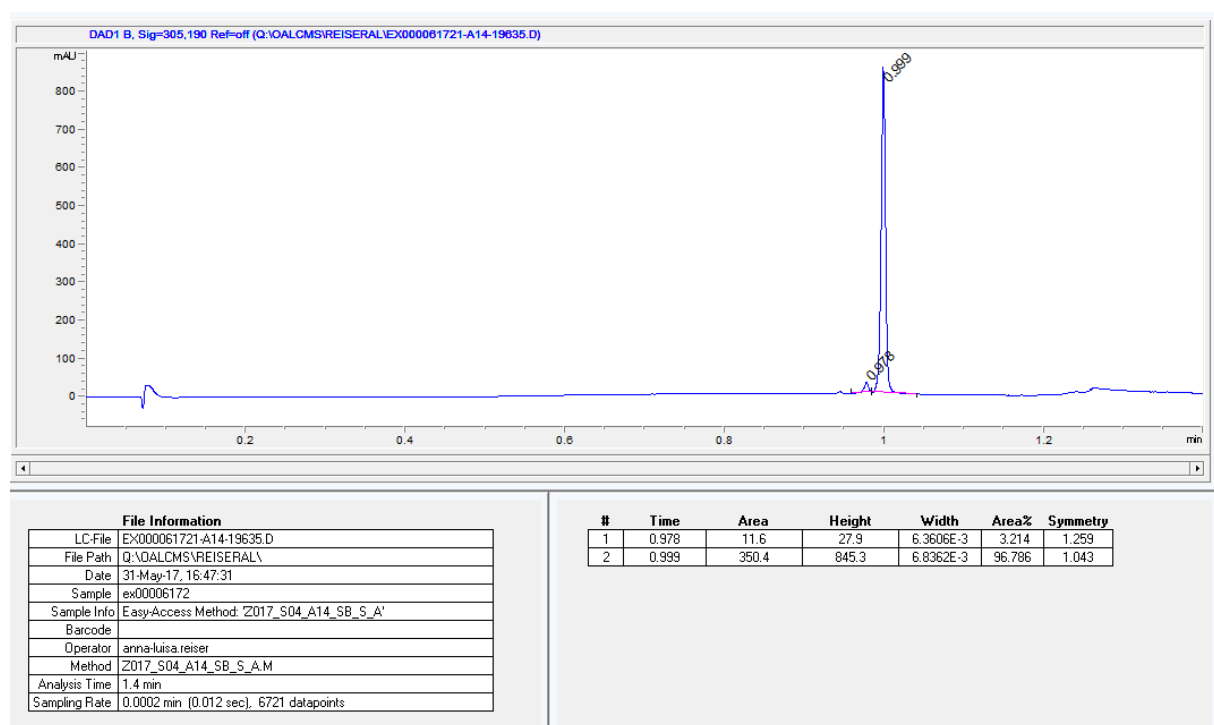

Supplemental Figure S11

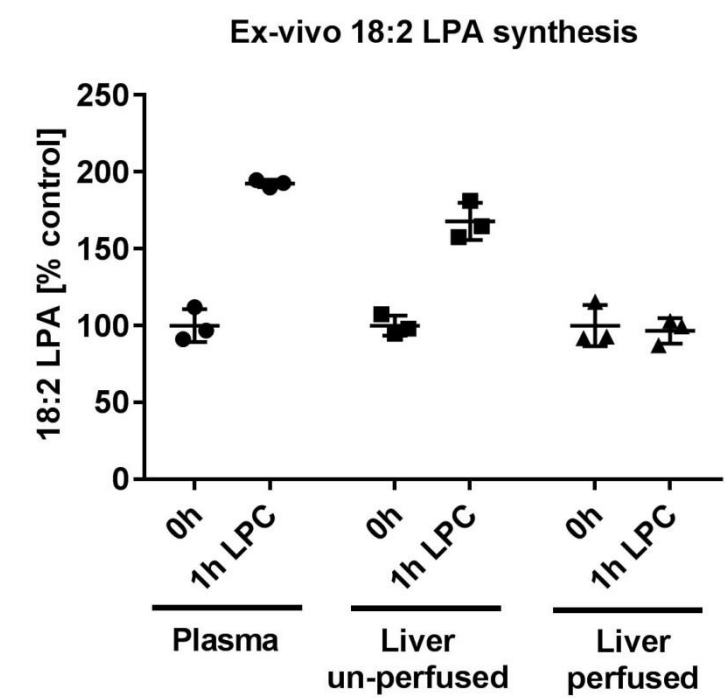

Supplemental Figure S12A

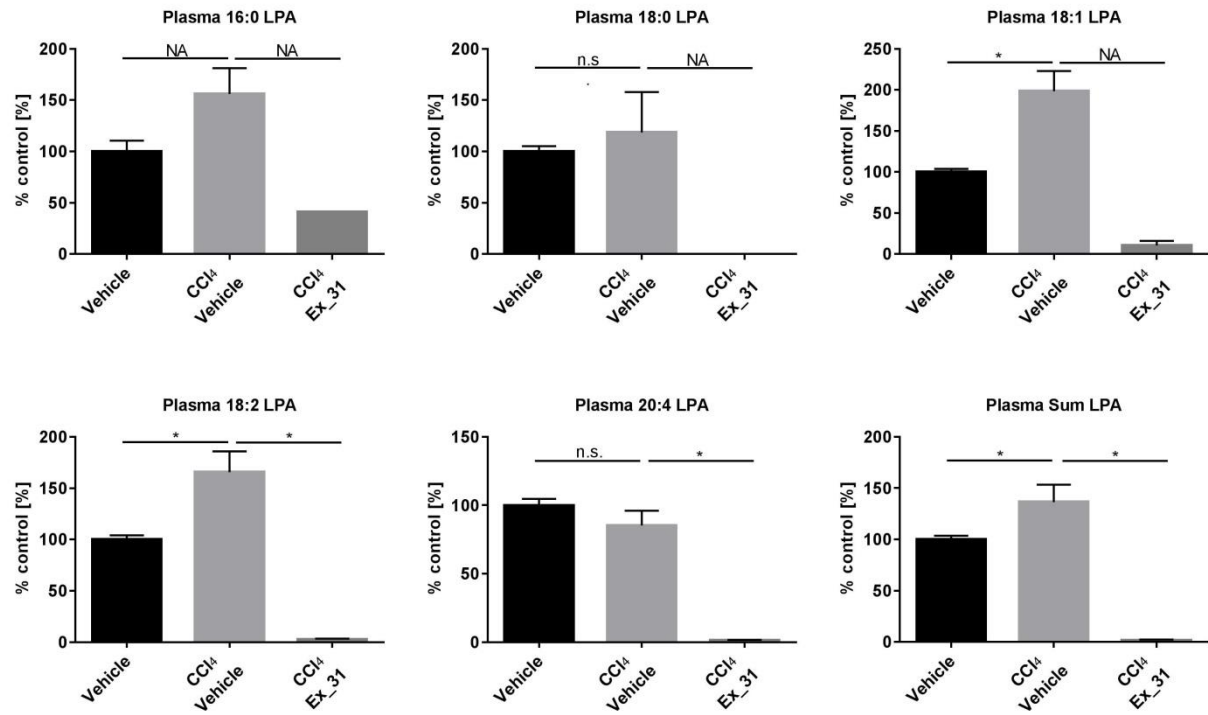

Supplemental Figure S12B

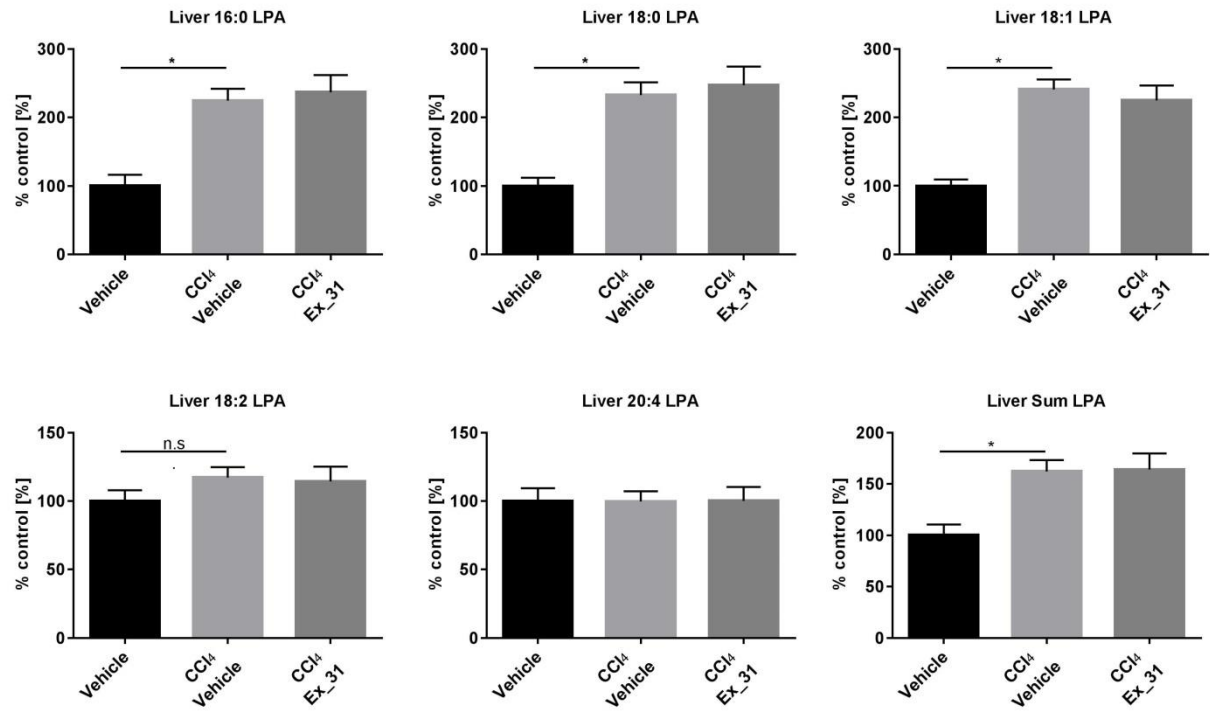

Supplemental Figure 12C

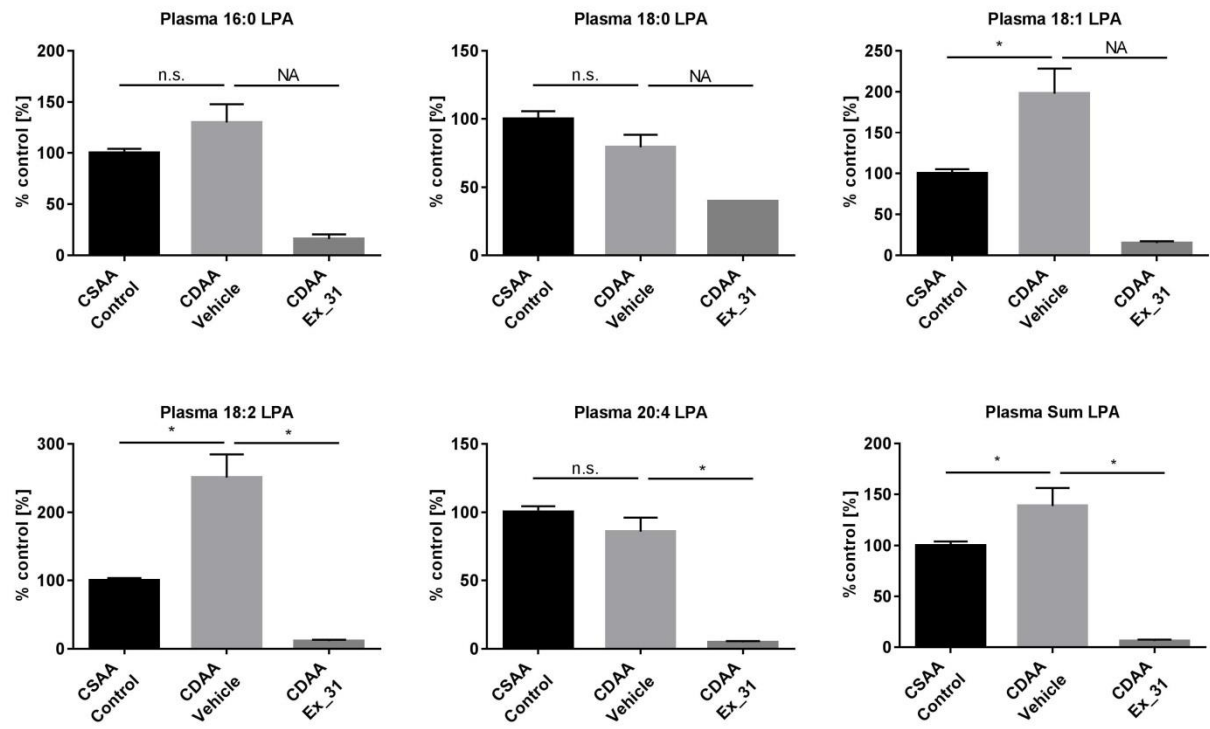

Supplemental Figure 12D

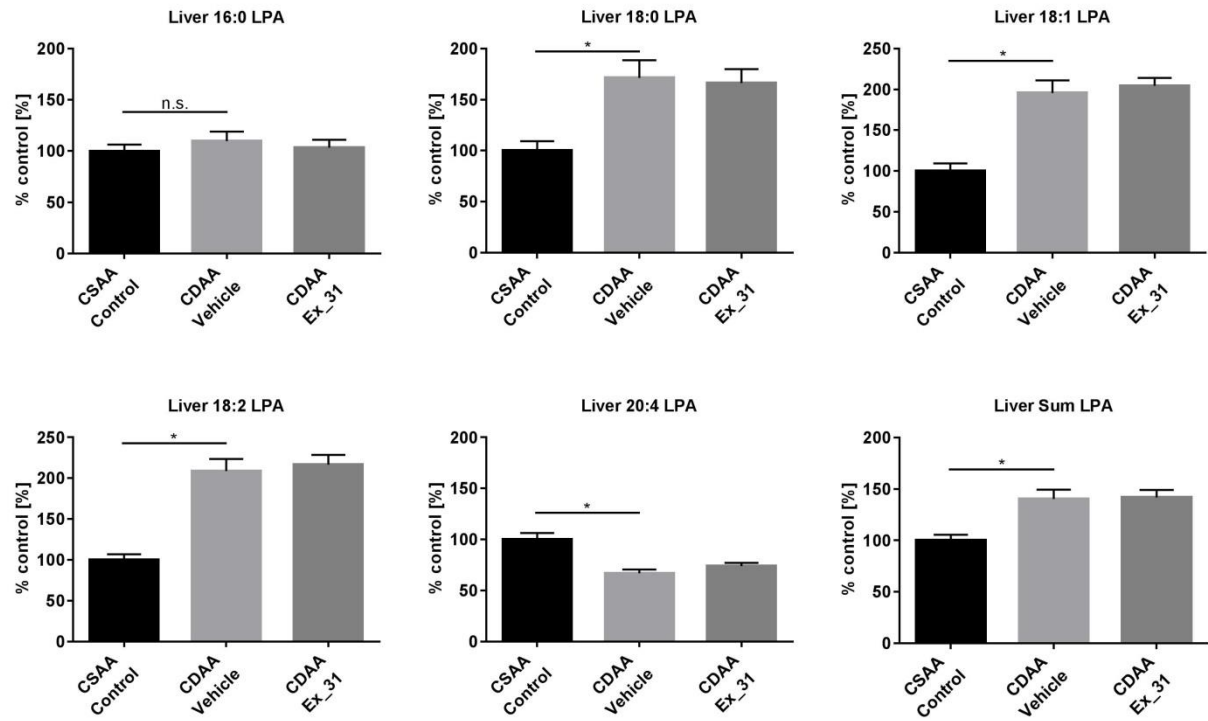

Supplement: BPH-175-693-s001.pdf [file BPH-175-693-s001.pdf]
